# Supplementary material
Source: Springer Nature journal article supplement (https://www.springermedizin.de/resource/supplementary/12891_2012_1609_MOESM4_ESM.pdf/9509062)

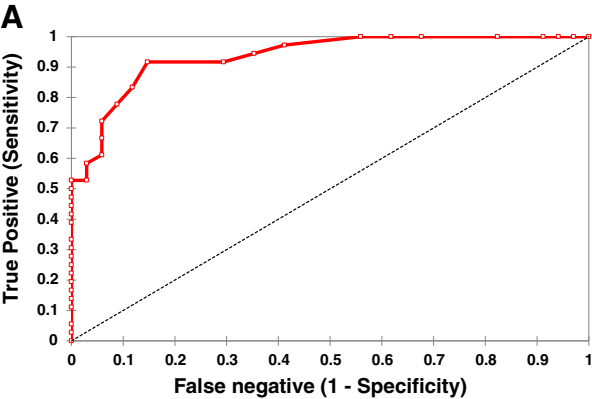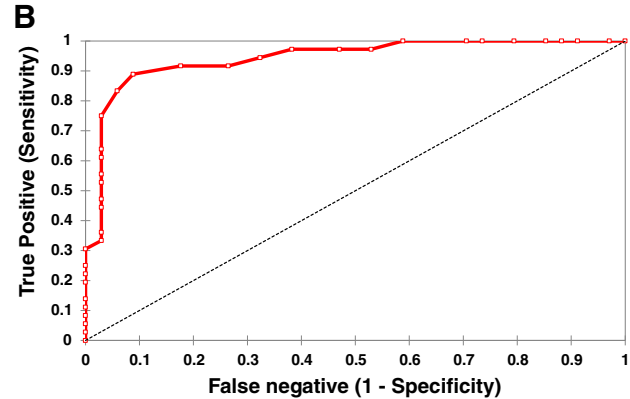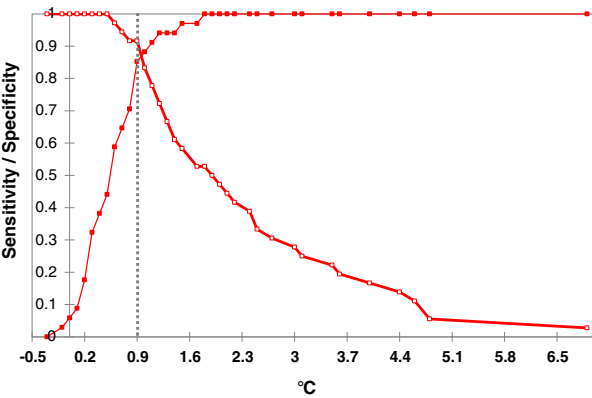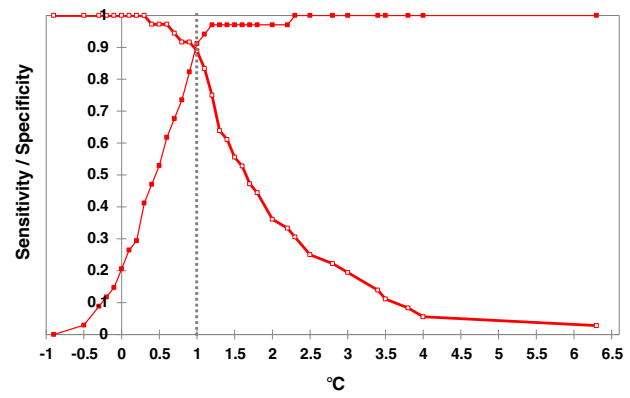

Supplement: MOESM4 [file 9509062]
